# Supplementary figures and images for: Group Lifestyle Intervention With Mobile Health for Young Adults With Serious Mental Illness: A Randomized Controlled Trial
Source: Atypon-hosted journal article supplement (doi:10.1176/appi.ps.202100047), 2021-06-30

Online Supplement. Study Consort Diagram

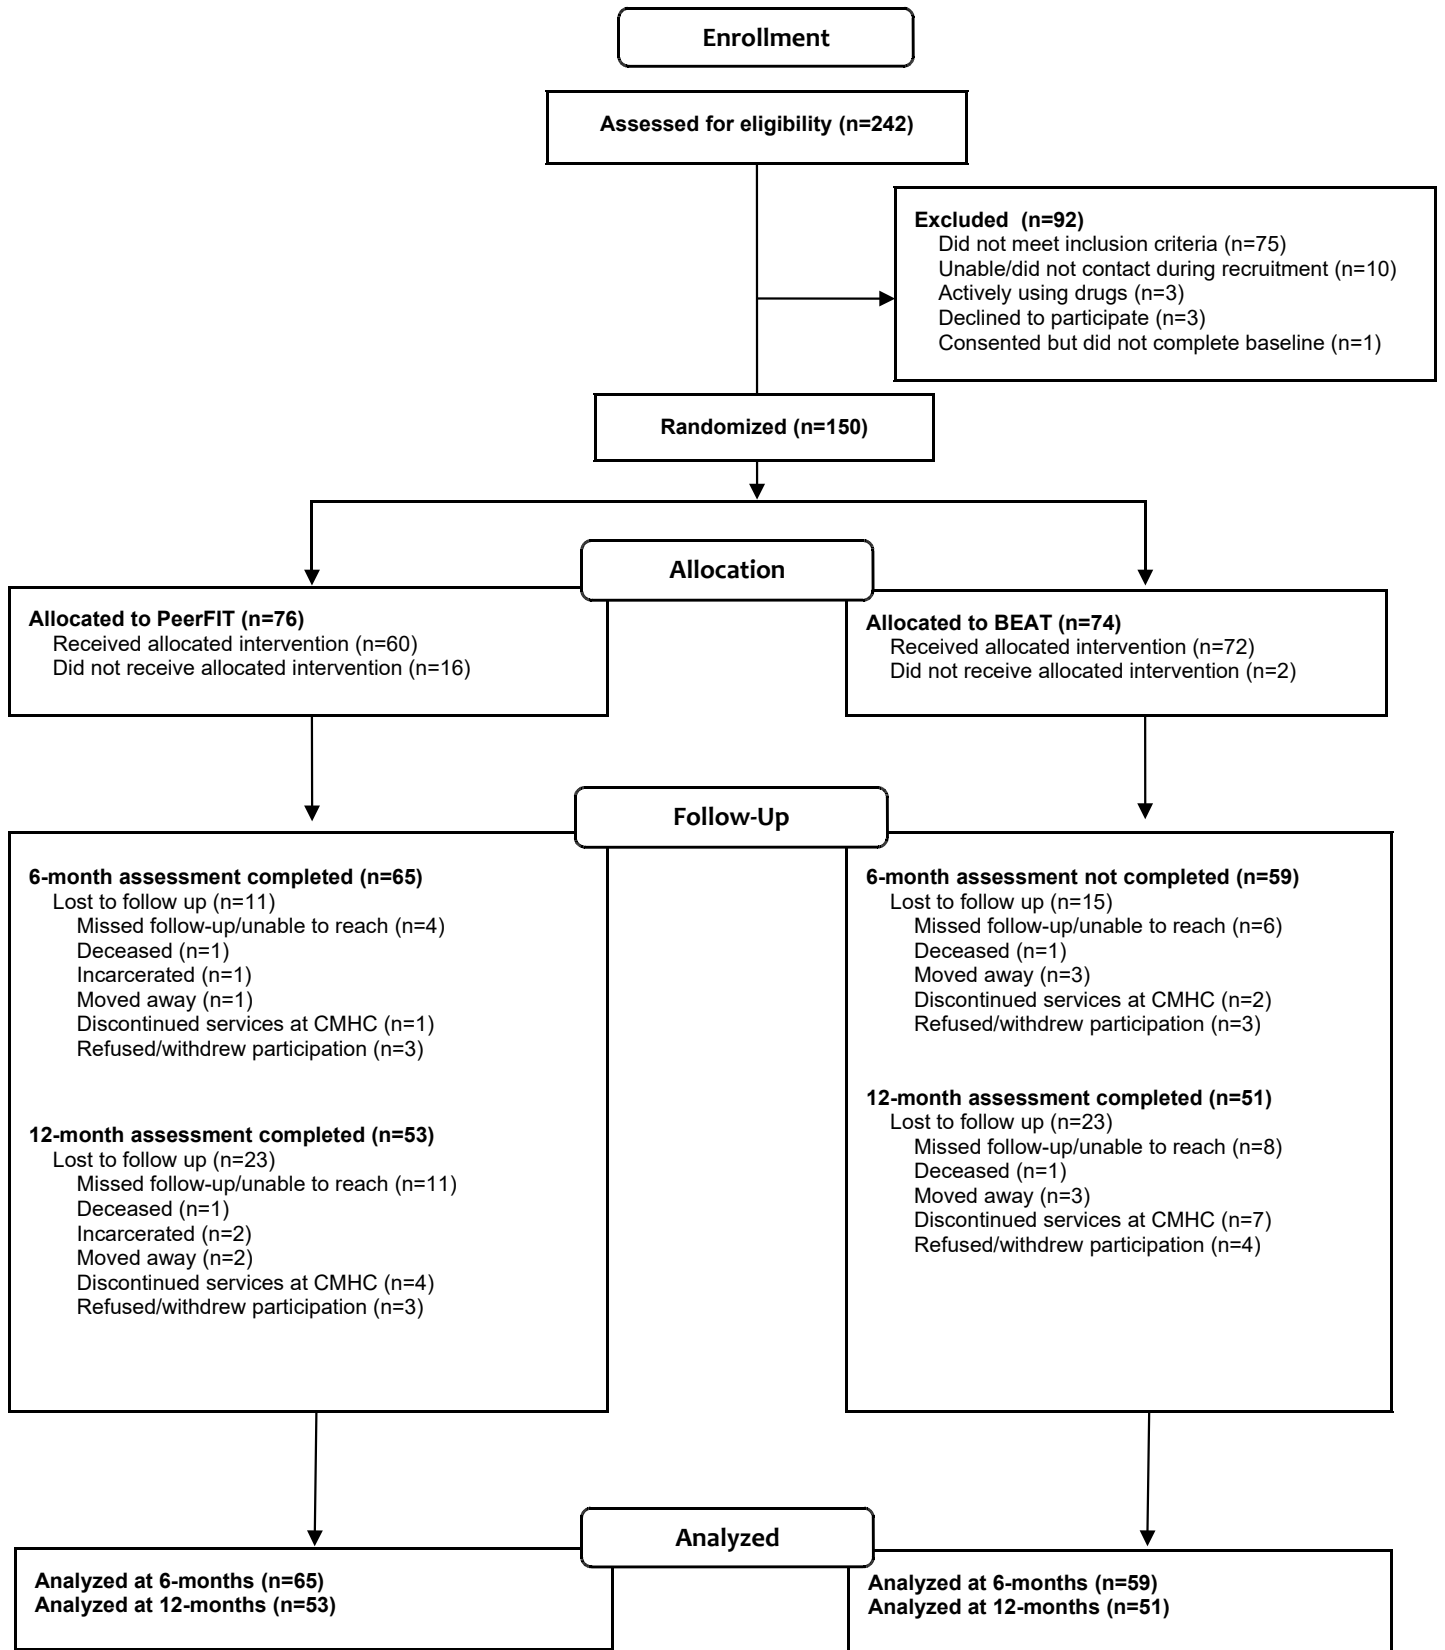

Supplement: appi.ps.202100047.ds001.pdf [file appi.ps.202100047.ds001.pdf]
